# Supplementary material for: Comparative Genomic Analysis of Antimicrobial-Resistant Escherichia coli from South American Camelids in Central Germany
Source: MDPI journal article supplement (doi:10.3390/microorganisms10091697), 2022-08-24
Supplement: s1 [file s1]

| Antibiotic class          | ARG Total | %   | ARG                       | No. | %   |
|---------------------------|-----------|-----|---------------------------|-----|-----|
| Beta-lactam               | 35        | 90% | blaCMY-2                  | 2   | 5%  |
|                           |           |     | blaCTX-M-15               | 2   | 5%  |
|                           |           |     | blaCTX-M-1                | 16  | 41% |
|                           |           |     | blaCTX-M-27               | 2   | 5%  |
|                           |           |     | blaCTX-M-65               | 1   | 3%  |
|                           |           |     | blaOXA-10                 | 1   | 3%  |
|                           |           |     | blaSHV-12                 | 1   | 3%  |
|                           |           |     | blaTEM-1B                 | 18  | 46% |
| Fluoroquinolone           | 24        | 62% | qnrB19                    | 1   | 3%  |
| Fluoroquinolone mutations |           |     | qnrS1                     | 4   | 10% |
|                           |           |     | gyrA:p.S83L               | 22  | 56% |
|                           |           |     | parC:p.S80I               | 19  | 49% |
|                           |           |     | gyrA:p.D87N               | 17  | 44% |
|                           |           |     | parC:p.A56T               | 3   | 8%  |
|                           |           |     | parC:p.A56T               | 1   | 3%  |
|                           |           |     | Folate pathway antagonist | 22  | 56% |
| dfrA12                    | 1         | 3%  |                           |     |     |
| dfrA14                    | 4         | 10% |                           |     |     |
| dfrA17                    | 9         | 23% |                           |     |     |
| dfrA1                     | 4         | 10% |                           |     |     |
| sul1                      | 6         | 15% |                           |     |     |
| sul2-2                    | 12        | 31% |                           |     |     |
| sul2-3                    | 5         | 13% |                           |     |     |
| sul3                      | 2         | 5%  |                           |     |     |
| Aminoglycoside            | 20        | 51% | aac(3)-Iid                | 2   | 5%  |
|                           |           |     | aadA1                     | 1   | 3%  |
|                           |           |     | aadA2                     | 4   | 10% |
|                           |           |     | aadA5                     | 10  | 26% |
|                           |           |     | ant(3'')-Ia               | 5   | 13% |
|                           |           |     | aph(3'')-Ib-1             | 4   | 10% |
|                           |           |     | aph(3'')-Ib-5             | 13  | 33% |
|                           |           |     | aph(3'')-Ia-1             | 2   | 5%  |
|                           |           |     | aph(6)-Id                 | 15  | 38% |
| Tetracycline              | 18        | 46% | tetA(6)                   | 10  | 26% |
|                           |           |     | tetB(1)                   | 2   | 5%  |
|                           |           |     | tetB(2)                   | 8   | 21% |
| Phenicol                  | 12        | 31% | catA1                     | 5   | 13% |
|                           |           |     | cmlA1                     | 2   | 5%  |
|                           |           |     | floR2                     | 6   | 15% |
| Macrolide                 | 7         | 18% | mefC                      | 2   | 5%  |
|                           |           |     | mphG                      | 2   | 5%  |
| Macrolide/Rifamycin       | 1         | 3%  | mphA                      | 4   | 10% |
| Rifamycin                 |           |     | arr-3                     | 1   | 3%  |
